# Supplementary material for: A multicenter study on Leigh syndrome: disease course and predictors of survival
Source: Orphanet J Rare Dis. 2014 Apr 15;9:52. doi: 10.1186/1750-1172-9-52 (PMC4021638; doi:10.1186/1750-1172-9-52)
Supplement: Additional file 1: Table S1 — Case Report Form. [file 1750-1172-9-52-S1.pdf]

## CASE REPORT FORM (CRF)

## A Retrospective, Multinational Study of Patients with Leigh Syndrome

|                                                                                                                                                                                                                                                                                                                                                                                                                                                                                                                                                                                                                                                                                                                                                                                                                                                                                                                                                                                                                                                                                                                                                                                                                                                                                                                                                                                                                                                                                                                                                                                                                                                                                                                                                                                                                                                                                                                                                                                                                                                                                                                                                                                                                 |                   |                                                                                                                                                      |
|-----------------------------------------------------------------------------------------------------------------------------------------------------------------------------------------------------------------------------------------------------------------------------------------------------------------------------------------------------------------------------------------------------------------------------------------------------------------------------------------------------------------------------------------------------------------------------------------------------------------------------------------------------------------------------------------------------------------------------------------------------------------------------------------------------------------------------------------------------------------------------------------------------------------------------------------------------------------------------------------------------------------------------------------------------------------------------------------------------------------------------------------------------------------------------------------------------------------------------------------------------------------------------------------------------------------------------------------------------------------------------------------------------------------------------------------------------------------------------------------------------------------------------------------------------------------------------------------------------------------------------------------------------------------------------------------------------------------------------------------------------------------------------------------------------------------------------------------------------------------------------------------------------------------------------------------------------------------------------------------------------------------------------------------------------------------------------------------------------------------------------------------------------------------------------------------------------------------|-------------------|------------------------------------------------------------------------------------------------------------------------------------------------------|
| Site ID: _____                                                                                                                                                                                                                                                                                                                                                                                                                                                                                                                                                                                                                                                                                                                                                                                                                                                                                                                                                                                                                                                                                                                                                                                                                                                                                                                                                                                                                                                                                                                                                                                                                                                                                                                                                                                                                                                                                                                                                                                                                                                                                                                                                                                                  | Patient ID: _____ | Date of registration: ____/____/____                                                                                                                 |
| INCLUSION/EXCLUSION CRITERIA                                                                                                                                                                                                                                                                                                                                                                                                                                                                                                                                                                                                                                                                                                                                                                                                                                                                                                                                                                                                                                                                                                                                                                                                                                                                                                                                                                                                                                                                                                                                                                                                                                                                                                                                                                                                                                                                                                                                                                                                                                                                                                                                                                                    |                   |                                                                                                                                                      |
| <b>INCLUSION CRITERIA</b><br>1. Clinical features compatible with Leigh syndrome, i.e. psychomotor regression, brainstem dysfunction, ataxia, dystonia, optic atrophy<br>2. MRI or CT or neuropathological findings of Leigh syndrome, i.e. bilateral symmetrical lesions in the basal ganglia, and/or thalamus, and/or brainstem§.                                                                                                                                                                                                                                                                                                                                                                                                                                                                                                                                                                                                                                                                                                                                                                                                                                                                                                                                                                                                                                                                                                                                                                                                                                                                                                                                                                                                                                                                                                                                                                                                                                                                                                                                                                                                                                                                             |                   | <input type="checkbox"/> <b>Yes</b> <input type="checkbox"/> <b>No</b><br><br><input type="checkbox"/> <b>Yes</b> <input type="checkbox"/> <b>No</b> |
| All inclusion criteria must be answered <b>Yes</b> , to be included in the study.                                                                                                                                                                                                                                                                                                                                                                                                                                                                                                                                                                                                                                                                                                                                                                                                                                                                                                                                                                                                                                                                                                                                                                                                                                                                                                                                                                                                                                                                                                                                                                                                                                                                                                                                                                                                                                                                                                                                                                                                                                                                                                                               |                   |                                                                                                                                                      |
| <b>EXCLUSION CRITERIA</b><br>1. Known syndromic mitochondrial phenotype other than Leigh syndrome.                                                                                                                                                                                                                                                                                                                                                                                                                                                                                                                                                                                                                                                                                                                                                                                                                                                                                                                                                                                                                                                                                                                                                                                                                                                                                                                                                                                                                                                                                                                                                                                                                                                                                                                                                                                                                                                                                                                                                                                                                                                                                                              |                   | <input type="checkbox"/> <b>Yes</b> <input type="checkbox"/> <b>No</b>                                                                               |
| All exclusion criteria must be answered <b>No</b> , to be included in the study. If any of the exclusion criteria is answered Yes, the patient must be excluded from the study and no data must be collected in the following fields of the present CRF.                                                                                                                                                                                                                                                                                                                                                                                                                                                                                                                                                                                                                                                                                                                                                                                                                                                                                                                                                                                                                                                                                                                                                                                                                                                                                                                                                                                                                                                                                                                                                                                                                                                                                                                                                                                                                                                                                                                                                        |                   |                                                                                                                                                      |
| DEMOGRAPHICS                                                                                                                                                                                                                                                                                                                                                                                                                                                                                                                                                                                                                                                                                                                                                                                                                                                                                                                                                                                                                                                                                                                                                                                                                                                                                                                                                                                                                                                                                                                                                                                                                                                                                                                                                                                                                                                                                                                                                                                                                                                                                                                                                                                                    |                   |                                                                                                                                                      |
| - <b>Date of birth</b> (mm/yyyy): ____/____/____<br>- <b>Gender:</b> <input type="checkbox"/> male <input type="checkbox"/> female<br>- <b>Race:</b> <input type="checkbox"/> caucasian <input type="checkbox"/> black <input type="checkbox"/> asian <input type="checkbox"/> other _____ <input type="checkbox"/> Unknown                                                                                                                                                                                                                                                                                                                                                                                                                                                                                                                                                                                                                                                                                                                                                                                                                                                                                                                                                                                                                                                                                                                                                                                                                                                                                                                                                                                                                                                                                                                                                                                                                                                                                                                                                                                                                                                                                     |                   |                                                                                                                                                      |
| FAMILY HISTORY                                                                                                                                                                                                                                                                                                                                                                                                                                                                                                                                                                                                                                                                                                                                                                                                                                                                                                                                                                                                                                                                                                                                                                                                                                                                                                                                                                                                                                                                                                                                                                                                                                                                                                                                                                                                                                                                                                                                                                                                                                                                                                                                                                                                  |                   |                                                                                                                                                      |
| - <b>Parental consanguinity:</b> <input type="checkbox"/> No <input type="checkbox"/> Yes <input type="checkbox"/> Unknown<br><i>If yes</i> , specify degree of relatedness: _____<br>- <b>Presence of Leigh (or Leigh-like) syndrome in a relative:</b> <input type="checkbox"/> No <input type="checkbox"/> Yes <input type="checkbox"/> Unknown<br><i>If yes</i> , specify a) gender: <input type="checkbox"/> Male <input type="checkbox"/> Female <input type="checkbox"/> Unknown<br>b) origin of relatedness: <input type="checkbox"/> Maternal <input type="checkbox"/> Paternal <input type="checkbox"/> Unknown<br>c) degree of relatedness: <input type="checkbox"/> 1st-degree <input type="checkbox"/> 2nd-degree <input type="checkbox"/> 3rd-degree <input type="checkbox"/> >3rd-degree <input type="checkbox"/> Unknown<br><br>- <b>Presence of other mitochondrial disorder in a relative:</b> <input type="checkbox"/> No <input type="checkbox"/> Yes <input type="checkbox"/> Unknown<br><i>If yes</i> , specify a) Disorder _____,<br>b) Origin of relatedness: <input type="checkbox"/> Maternal <input type="checkbox"/> Paternal <input type="checkbox"/> Unknown<br>c) Degree of relatedness: <input type="checkbox"/> 1st-degree <input type="checkbox"/> 2nd-degree <input type="checkbox"/> 3rd-degree <input type="checkbox"/> >3rd-degree <input type="checkbox"/> Unknown<br><br>- <b>Presence of other neurological disorder in a relative:</b> <input type="checkbox"/> No <input type="checkbox"/> Yes <input type="checkbox"/> Unknown<br><i>If yes</i> , specify a) Disorder _____,<br>b) Origin of relatedness: <input type="checkbox"/> Maternal <input type="checkbox"/> Paternal <input type="checkbox"/> Unknown<br>c) Degree of relatedness: <input type="checkbox"/> 1st-degree <input type="checkbox"/> 2nd-degree <input type="checkbox"/> 3rd-degree <input type="checkbox"/> >3rd-degree <input type="checkbox"/> Unknown<br>- <b>Comments</b> _____                                                                                                                                                                                                            |                   |                                                                                                                                                      |
| MEDICAL HISTORY                                                                                                                                                                                                                                                                                                                                                                                                                                                                                                                                                                                                                                                                                                                                                                                                                                                                                                                                                                                                                                                                                                                                                                                                                                                                                                                                                                                                                                                                                                                                                                                                                                                                                                                                                                                                                                                                                                                                                                                                                                                                                                                                                                                                 |                   |                                                                                                                                                      |
| <b>Perinatal History</b>                                                                                                                                                                                                                                                                                                                                                                                                                                                                                                                                                                                                                                                                                                                                                                                                                                                                                                                                                                                                                                                                                                                                                                                                                                                                                                                                                                                                                                                                                                                                                                                                                                                                                                                                                                                                                                                                                                                                                                                                                                                                                                                                                                                        |                   |                                                                                                                                                      |
| - <b>Gestational age:</b> <input type="checkbox"/> <35 weeks <input type="checkbox"/> 35-37 weeks <input type="checkbox"/> 38-41 weeks <input type="checkbox"/> >41 weeks <input type="checkbox"/> Unknown<br>- <b>Pregnancy:</b> <input type="checkbox"/> uneventful <input type="checkbox"/> complicated by _____ <input type="checkbox"/> Unknown<br>- <b>Birth weight§:</b> <input type="checkbox"/> AGA <input type="checkbox"/> SGA <input type="checkbox"/> LGA <input type="checkbox"/> Unknown<br>- <b>Did the fetus present intra-uterine growth restriction (IUGR)§:</b> <input type="checkbox"/> Yes <input type="checkbox"/> No <input type="checkbox"/> Unknown<br>- <b>Head circumference at birth§:</b> <input type="checkbox"/> normal <input type="checkbox"/> microcephaly <input type="checkbox"/> macrocephaly <input type="checkbox"/> Unknown<br>- <b>APGAR score at 1-5-10 minutes:</b> <input type="checkbox"/> - <input type="checkbox"/> - <input type="checkbox"/> <input type="checkbox"/> Unknown<br>- <b>Respiratory difficulties at birth necessitating interventions:</b> <input type="checkbox"/> No <input type="checkbox"/> Yes <input type="checkbox"/> Unknown<br><i>If yes</i> , specify: <input type="checkbox"/> oxygen by mask <input type="checkbox"/> nasal CPAP <input type="checkbox"/> intubation/ventilation<br>- <b>Any pathological signs at birth:</b> <input type="checkbox"/> No <input type="checkbox"/> Yes <input type="checkbox"/> Unknown<br><i>If yes</i> , specify: <input type="checkbox"/> hypotonia/floppiness <input type="checkbox"/> hypertonia <input type="checkbox"/> respiratory complications <input type="checkbox"/> seizures<br><input type="checkbox"/> dysmorphic features <input type="checkbox"/> cardiac complications <input type="checkbox"/> congenital lactic acidosis<br><input type="checkbox"/> other: _____<br>- <b>Prenatal onset of symptoms:</b> <input type="checkbox"/> Yes <input type="checkbox"/> No <input type="checkbox"/> Unknown<br><i>If no</i> , date at onset of symptoms (mm/yyyy): ____/____/____<br>- <b>Date of diagnostic testing for suspected mitochondrial disease (mm/yyyy):</b> ____/____/____ |                   |                                                                                                                                                      |

|                                                                                                                                                                                                                                                                                                       |                                                                                                                                                                                            |                                                        |                                |                                  |
|-------------------------------------------------------------------------------------------------------------------------------------------------------------------------------------------------------------------------------------------------------------------------------------------------------|--------------------------------------------------------------------------------------------------------------------------------------------------------------------------------------------|--------------------------------------------------------|--------------------------------|----------------------------------|
| <b>- Specify type of diagnostic testing</b> (more than one answers may be selected):<br><input type="checkbox"/> muscle biopsy <input type="checkbox"/> liver biopsy <input type="checkbox"/> fibroblasts <input type="checkbox"/> genetic investigation <input type="checkbox"/> other, specify_____ |                                                                                                                                                                                            |                                                        |                                |                                  |
| <b>Clinical Features</b>                                                                                                                                                                                                                                                                              |                                                                                                                                                                                            |                                                        |                                |                                  |
| Fill in any of the following clinical features presented either at onset or during the disease course and specify time at presentation (i.e. at onset or later).                                                                                                                                      |                                                                                                                                                                                            |                                                        |                                |                                  |
| <b>Motor dysfunction</b> <input type="checkbox"/> No <input type="checkbox"/> Yes                                                                                                                                                                                                                     |                                                                                                                                                                                            | <i>If yes, please specify all that are applicable:</i> |                                |                                  |
| <input type="checkbox"/> Hypotonia                                                                                                                                                                                                                                                                    |                                                                                                                                                                                            | <input type="checkbox"/> At onset                      | <input type="checkbox"/> later | <input type="checkbox"/> Unknown |
| <input type="checkbox"/> Hypertonia                                                                                                                                                                                                                                                                   |                                                                                                                                                                                            | <input type="checkbox"/> At onset                      | <input type="checkbox"/> later | <input type="checkbox"/> Unknown |
| <input type="checkbox"/> Dystonia                                                                                                                                                                                                                                                                     |                                                                                                                                                                                            | <input type="checkbox"/> At onset                      | <input type="checkbox"/> later | <input type="checkbox"/> Unknown |
| <input type="checkbox"/> Ataxia                                                                                                                                                                                                                                                                       | <input type="checkbox"/> Cerebellar<br><input type="checkbox"/> Sensory<br><input type="checkbox"/> Unknown                                                                                | <input type="checkbox"/> At onset                      | <input type="checkbox"/> later | <input type="checkbox"/> Unknown |
| <input type="checkbox"/> Spasticity                                                                                                                                                                                                                                                                   |                                                                                                                                                                                            | <input type="checkbox"/> At onset                      | <input type="checkbox"/> later | <input type="checkbox"/> Unknown |
| <input type="checkbox"/> Paresis/palsy                                                                                                                                                                                                                                                                | <input type="checkbox"/> Hemiparesis/plegia<br><input type="checkbox"/> Paraparesis/plegia<br><input type="checkbox"/> Quadriparesis/plegia<br><input type="checkbox"/> Monoparesis/plegia | <input type="checkbox"/> At onset                      | <input type="checkbox"/> later | <input type="checkbox"/> Unknown |
| <input type="checkbox"/> Myoclonus                                                                                                                                                                                                                                                                    |                                                                                                                                                                                            | <input type="checkbox"/> At onset                      | <input type="checkbox"/> later | <input type="checkbox"/> Unknown |
| <input type="checkbox"/> Hypokinesia/ Bradykinesia                                                                                                                                                                                                                                                    |                                                                                                                                                                                            | <input type="checkbox"/> At onset                      | <input type="checkbox"/> later | <input type="checkbox"/> Unknown |
| <input type="checkbox"/> Chorea/Athetosis                                                                                                                                                                                                                                                             |                                                                                                                                                                                            | <input type="checkbox"/> At onset                      | <input type="checkbox"/> later | <input type="checkbox"/> Unknown |
| <input type="checkbox"/> Other dyskinetic disorder                                                                                                                                                                                                                                                    | Specify: _____                                                                                                                                                                             | <input type="checkbox"/> At onset                      | <input type="checkbox"/> later | <input type="checkbox"/> Unknown |
| <input type="checkbox"/> Muscle weakness                                                                                                                                                                                                                                                              |                                                                                                                                                                                            | <input type="checkbox"/> At onset                      | <input type="checkbox"/> later | <input type="checkbox"/> Unknown |
| <input type="checkbox"/> Cavus feet                                                                                                                                                                                                                                                                   |                                                                                                                                                                                            | <input type="checkbox"/> At onset                      | <input type="checkbox"/> later | <input type="checkbox"/> Unknown |
| <input type="checkbox"/> Babinski sign                                                                                                                                                                                                                                                                |                                                                                                                                                                                            | <input type="checkbox"/> At onset                      | <input type="checkbox"/> later | <input type="checkbox"/> Unknown |
| <input type="checkbox"/> Tendon reflexes                                                                                                                                                                                                                                                              | Specify: _____                                                                                                                                                                             | <input type="checkbox"/> At onset                      | <input type="checkbox"/> later | <input type="checkbox"/> Unknown |
| <b>Ophthalmological dysfunction</b> <input type="checkbox"/> No <input type="checkbox"/> Yes                                                                                                                                                                                                          |                                                                                                                                                                                            | <i>If yes, please specify all that are applicable:</i> |                                |                                  |
| <input type="checkbox"/> Ptosis                                                                                                                                                                                                                                                                       |                                                                                                                                                                                            | <input type="checkbox"/> At onset                      | <input type="checkbox"/> later | <input type="checkbox"/> Unknown |
| <input type="checkbox"/> Reduced eye motility                                                                                                                                                                                                                                                         |                                                                                                                                                                                            | <input type="checkbox"/> At onset                      | <input type="checkbox"/> later | <input type="checkbox"/> Unknown |
| <input type="checkbox"/> Strabismus                                                                                                                                                                                                                                                                   |                                                                                                                                                                                            | <input type="checkbox"/> At onset                      | <input type="checkbox"/> later | <input type="checkbox"/> Unknown |
| <input type="checkbox"/> Nystagmus                                                                                                                                                                                                                                                                    |                                                                                                                                                                                            | <input type="checkbox"/> At onset                      | <input type="checkbox"/> later | <input type="checkbox"/> Unknown |
| <input type="checkbox"/> Optic atrophy                                                                                                                                                                                                                                                                |                                                                                                                                                                                            | <input type="checkbox"/> At onset                      | <input type="checkbox"/> later | <input type="checkbox"/> Unknown |
| <input type="checkbox"/> Retinopathy                                                                                                                                                                                                                                                                  |                                                                                                                                                                                            | <input type="checkbox"/> At onset                      | <input type="checkbox"/> later | <input type="checkbox"/> Unknown |
| <input type="checkbox"/> Visual impairment                                                                                                                                                                                                                                                            |                                                                                                                                                                                            | <input type="checkbox"/> At onset                      | <input type="checkbox"/> later | <input type="checkbox"/> Unknown |
| <input type="checkbox"/> Other                                                                                                                                                                                                                                                                        | Specify: _____                                                                                                                                                                             | <input type="checkbox"/> At onset                      | <input type="checkbox"/> later | <input type="checkbox"/> Unknown |

| Other dysfunction <input type="checkbox"/> No <input type="checkbox"/> Yes         |                                   | If yes, please specify all that are applicable: |                                  |                                  |
|------------------------------------------------------------------------------------|-----------------------------------|-------------------------------------------------|----------------------------------|----------------------------------|
| <input type="checkbox"/> Seizures                                                  |                                   |                                                 |                                  |                                  |
| <input type="checkbox"/> Partial seizures                                          | <input type="checkbox"/> At onset | <input type="checkbox"/> later                  | <input type="checkbox"/> Unknown |                                  |
| <input type="checkbox"/> Generalized seizures                                      | <input type="checkbox"/> At onset | <input type="checkbox"/> later                  | <input type="checkbox"/> Unknown |                                  |
| <input type="checkbox"/> Neonatal seizures                                         | <input type="checkbox"/> At onset | <input type="checkbox"/> later                  | <input type="checkbox"/> Unknown |                                  |
| <input type="checkbox"/> Myoclonic seizures                                        | <input type="checkbox"/> At onset | <input type="checkbox"/> later                  | <input type="checkbox"/> Unknown |                                  |
| <input type="checkbox"/> Epilepsy syndrome _____                                   | <input type="checkbox"/> At onset | <input type="checkbox"/> later                  | <input type="checkbox"/> Unknown |                                  |
| <input type="checkbox"/> Other _____                                               | <input type="checkbox"/> At onset | <input type="checkbox"/> later                  | <input type="checkbox"/> Unknown |                                  |
| Are seizures therapy-resistant?                                                    |                                   | <input type="checkbox"/> Yes                    | <input type="checkbox"/> No      |                                  |
| Has the patient received valproate treatment?                                      |                                   | <input type="checkbox"/> Yes                    | <input type="checkbox"/> No      |                                  |
| <input type="checkbox"/> Cardiac dysfunction                                       |                                   |                                                 |                                  |                                  |
| <input type="checkbox"/> Conduction defects                                        | <input type="checkbox"/> At onset | <input type="checkbox"/> later                  | <input type="checkbox"/> Unknown |                                  |
| <input type="checkbox"/> Dilated cardiomyopathy                                    | <input type="checkbox"/> At onset | <input type="checkbox"/> later                  | <input type="checkbox"/> Unknown |                                  |
| <input type="checkbox"/> Hypertrophic cardiomyopathy                               | <input type="checkbox"/> At onset | <input type="checkbox"/> later                  | <input type="checkbox"/> Unknown |                                  |
| <input type="checkbox"/> Other _____                                               | <input type="checkbox"/> At onset | <input type="checkbox"/> later                  | <input type="checkbox"/> Unknown |                                  |
| <input type="checkbox"/> Hepatic dysfunction                                       |                                   |                                                 |                                  |                                  |
| Specify: _____                                                                     | <input type="checkbox"/> At onset | <input type="checkbox"/> later                  | <input type="checkbox"/> Unknown |                                  |
| <input type="checkbox"/> Renal dysfunction                                         |                                   |                                                 |                                  |                                  |
| Specify: _____                                                                     | <input type="checkbox"/> At onset | <input type="checkbox"/> later                  | <input type="checkbox"/> Unknown |                                  |
| <input type="checkbox"/> Failure to thrive§                                        |                                   |                                                 |                                  |                                  |
| <input type="checkbox"/> Feeding difficulties                                      |                                   |                                                 |                                  |                                  |
| <input type="checkbox"/> requiring gastrostomy                                     | <input type="checkbox"/> At onset | <input type="checkbox"/> later                  | <input type="checkbox"/> Unknown |                                  |
| <input type="checkbox"/> requiring feeding tube                                    | <input type="checkbox"/> At onset | <input type="checkbox"/> later                  | <input type="checkbox"/> Unknown |                                  |
| <input type="checkbox"/> Sucking dysfunction                                       |                                   |                                                 |                                  |                                  |
| <input type="checkbox"/> Mental retardation§                                       |                                   |                                                 |                                  |                                  |
| <input type="checkbox"/> Mild                                                      | <input type="checkbox"/> At onset | <input type="checkbox"/> later                  | <input type="checkbox"/> Unknown |                                  |
| <input type="checkbox"/> Moderate                                                  | <input type="checkbox"/> At onset | <input type="checkbox"/> later                  | <input type="checkbox"/> Unknown |                                  |
| <input type="checkbox"/> Severe                                                    | <input type="checkbox"/> At onset | <input type="checkbox"/> later                  | <input type="checkbox"/> Unknown |                                  |
| <input type="checkbox"/> Profound                                                  | <input type="checkbox"/> At onset | <input type="checkbox"/> later                  | <input type="checkbox"/> Unknown |                                  |
| <input type="checkbox"/> Microcephaly                                              |                                   |                                                 |                                  |                                  |
| Progressive microcephaly§ <input type="checkbox"/> yes <input type="checkbox"/> no |                                   | <input type="checkbox"/> At onset               | <input type="checkbox"/> later   | <input type="checkbox"/> Unknown |
| <input type="checkbox"/> Hearing dysfunction                                       |                                   |                                                 |                                  |                                  |
| <input type="checkbox"/> Conductive                                                | <input type="checkbox"/> At onset | <input type="checkbox"/> later                  | <input type="checkbox"/> Unknown |                                  |
| <input type="checkbox"/> Sensorineural                                             | <input type="checkbox"/> At onset | <input type="checkbox"/> later                  | <input type="checkbox"/> Unknown |                                  |
| <input type="checkbox"/> Peripheral neuropathy                                     |                                   |                                                 |                                  |                                  |
| <input type="checkbox"/> Demyelinating                                             | <input type="checkbox"/> At onset | <input type="checkbox"/> later                  | <input type="checkbox"/> Unknown |                                  |
| <input type="checkbox"/> Axonal                                                    | <input type="checkbox"/> At onset | <input type="checkbox"/> later                  | <input type="checkbox"/> Unknown |                                  |
| <input type="checkbox"/> Respiratory disturbance                                   |                                   |                                                 |                                  |                                  |
| <input type="checkbox"/> Apnea                                                     | <input type="checkbox"/> At onset | <input type="checkbox"/> later                  | <input type="checkbox"/> Unknown |                                  |
| <input type="checkbox"/> Central hypoventilation                                   | <input type="checkbox"/> At onset | <input type="checkbox"/> later                  | <input type="checkbox"/> Unknown |                                  |
| <input type="checkbox"/> Hyperventilation/Abnormal breathing pattern               | <input type="checkbox"/> At onset | <input type="checkbox"/> later                  | <input type="checkbox"/> Unknown |                                  |
| <input type="checkbox"/> Respiratory complications (non-CNS induced)               | <input type="checkbox"/> At onset | <input type="checkbox"/> later                  | <input type="checkbox"/> Unknown |                                  |
| <input type="checkbox"/> Hematological dysfunction                                 |                                   |                                                 |                                  |                                  |
| Specify: _____                                                                     | <input type="checkbox"/> At onset | <input type="checkbox"/> later                  | <input type="checkbox"/> Unknown |                                  |
| <input type="checkbox"/> Other dysfunction                                         |                                   |                                                 |                                  |                                  |
| Specify: _____                                                                     | <input type="checkbox"/> At onset | <input type="checkbox"/> later                  | <input type="checkbox"/> Unknown |                                  |

| DISEASE COURSE                                                                                                                                                                                                                                                          |                                  |
|-------------------------------------------------------------------------------------------------------------------------------------------------------------------------------------------------------------------------------------------------------------------------|----------------------------------|
| - Has the patient experienced acute exacerbation(s)/relapse(s) during the disease course§: <input type="checkbox"/> Yes <input type="checkbox"/> No <input type="checkbox"/> Unknown                                                                                    |                                  |
| If yes, specify a) the frequency of acute exacerbations/relapses during the past year:<br><input type="checkbox"/> ≤ 2 times <input type="checkbox"/> 3-5 times <input type="checkbox"/> 6-10 times <input type="checkbox"/> >10 times <input type="checkbox"/> Unknown |                                  |
| b) the main cause of acute exacerbations/relapses during the past year:<br><input type="checkbox"/> infection(s) <input type="checkbox"/> other, specify: _____ <input type="checkbox"/> Unknown                                                                        |                                  |
| c) did any of the acute exacerbations/relapses require ICU: <input type="checkbox"/> Yes <input type="checkbox"/> No <input type="checkbox"/> Unknown                                                                                                                   |                                  |
| SURVIVAL STATUS                                                                                                                                                                                                                                                         |                                  |
| - Current status§: <input type="checkbox"/> Alive <input type="checkbox"/> Deceased <input type="checkbox"/> Unknown/Lost-to-follow-up                                                                                                                                  |                                  |
| If lost-to-follow-up, please specify last date of follow-up (mm/yyyy): __/__/____                                                                                                                                                                                       |                                  |
| If deceased, please specify§: a) Date of death: __/__/____                                                                                                                                                                                                              |                                  |
| b) Cause of death: _____                                                                                                                                                                                                                                                |                                  |
| c) Has postmortem investigation been performed: <input type="checkbox"/> Yes <input type="checkbox"/> No <input type="checkbox"/> Unknown                                                                                                                               |                                  |
| GROWTH§                                                                                                                                                                                                                                                                 |                                  |
| - Date of latest examination (mm/yyyy): __/__/____                                                                                                                                                                                                                      | <input type="checkbox"/> Unknown |
| - Weight for age: ____ SD                                                                                                                                                                                                                                               | <input type="checkbox"/> Unknown |
| - Weight for height: ____ SD                                                                                                                                                                                                                                            | <input type="checkbox"/> Unknown |
| - Height for age: ____ SD                                                                                                                                                                                                                                               | <input type="checkbox"/> Unknown |
| - Head circumference for age: ____ SD                                                                                                                                                                                                                                   | <input type="checkbox"/> Unknown |

| LABORATORY FINDINGS                                                                                                                                  |                                                                                                                                                                                                                                              |
|------------------------------------------------------------------------------------------------------------------------------------------------------|----------------------------------------------------------------------------------------------------------------------------------------------------------------------------------------------------------------------------------------------|
| <b>Respiratory chain enzyme activity</b><br>(more than one fields may be selected)                                                                   | <input type="checkbox"/> Complex I deficiency <input type="checkbox"/> Complex II deficiency<br><input type="checkbox"/> Complex III deficiency <input type="checkbox"/> Complex IV deficiency <input type="checkbox"/> Complex V deficiency |
| <b>Absolute values in blood§ (units)</b>                                                                                                             |                                                                                                                                                                                                                                              |
| Lactate _____ mmol/l                                                                                                                                 | <input type="checkbox"/> Unknown                                                                                                                                                                                                             |
| Pyruvate _____ mmol/l                                                                                                                                | <input type="checkbox"/> Unknown                                                                                                                                                                                                             |
| Albumin _____ g/l                                                                                                                                    | <input type="checkbox"/> Unknown                                                                                                                                                                                                             |
| <b>Absolute values in CSF§ (units)</b>                                                                                                               |                                                                                                                                                                                                                                              |
| Lactate _____ mmol/l                                                                                                                                 | <input type="checkbox"/> Unknown                                                                                                                                                                                                             |
| Pyruvate _____ mmol/l                                                                                                                                | <input type="checkbox"/> Unknown                                                                                                                                                                                                             |
| Albumin _____ mg/l                                                                                                                                   | <input type="checkbox"/> Unknown                                                                                                                                                                                                             |
| <b>Lactate: pyruvate ratio in blood§ (units)</b>                                                                                                     |                                                                                                                                                                                                                                              |
| Lactate/Pyruvate _____ mmol/l / _____ mmol/l                                                                                                         | <input type="checkbox"/> Unknown                                                                                                                                                                                                             |
| <b>Lactate: pyruvate ratio in CSF § (units)</b>                                                                                                      |                                                                                                                                                                                                                                              |
| Lactate/Pyruvate _____ mmol/l / _____ mmol/l                                                                                                         | <input type="checkbox"/> Unknown                                                                                                                                                                                                             |
| <b>CSF/serum albumin ratio§</b> _____ <input type="checkbox"/> Unknown                                                                               |                                                                                                                                                                                                                                              |
| <b>Pathological aminoacids in plasma</b> <input type="checkbox"/> Yes <input type="checkbox"/> No <input type="checkbox"/> Unknown, If yes Specify:  |                                                                                                                                                                                                                                              |
| 1. _____ Type: _____ Absolute value: _____ Units: _____ Reference range: _____ - _____                                                               |                                                                                                                                                                                                                                              |
| 2. _____ Type: _____ Absolute value: _____ Units: _____ Reference range: _____ - _____                                                               |                                                                                                                                                                                                                                              |
| 3. _____ Type: _____ Absolute value: _____ Units: _____ Reference range: _____ - _____                                                               |                                                                                                                                                                                                                                              |
| <b>Pathological aminoacids in urin</b> <input type="checkbox"/> Yes <input type="checkbox"/> No <input type="checkbox"/> Unknown, If yes Specify:    |                                                                                                                                                                                                                                              |
| 1. _____ Type: _____ Absolute value: _____ Units: _____ Reference range: _____ - _____                                                               |                                                                                                                                                                                                                                              |
| 2. _____ Type: _____ Absolute value: _____ Units: _____ Reference range: _____ - _____                                                               |                                                                                                                                                                                                                                              |
| 3. _____ Type: _____ Absolute value: _____ Units: _____ Reference range: _____ - _____                                                               |                                                                                                                                                                                                                                              |
| <b>Pathological aminoacids in CSF</b> <input type="checkbox"/> Yes <input type="checkbox"/> No <input type="checkbox"/> Unknown, If yes Specify:     |                                                                                                                                                                                                                                              |
| 1. _____ Type: _____ Absolute value: _____ Units: _____ Reference range: _____ - _____                                                               |                                                                                                                                                                                                                                              |
| 2. _____ Type: _____ Absolute value: _____ Units: _____ Reference range: _____ - _____                                                               |                                                                                                                                                                                                                                              |
| 3. _____ Type: _____ Absolute value: _____ Units: _____ Reference range: _____ - _____                                                               |                                                                                                                                                                                                                                              |
| <b>Pathological organic acids in urin</b> <input type="checkbox"/> Yes <input type="checkbox"/> No <input type="checkbox"/> Unknown, If yes Specify: |                                                                                                                                                                                                                                              |
| 1. _____ Type: _____ Absolute value: _____ Units: _____ Reference range: _____ - _____                                                               |                                                                                                                                                                                                                                              |
| 2. _____ Type: _____ Absolute value: _____ Units: _____ Reference range: _____ - _____                                                               |                                                                                                                                                                                                                                              |
| 3. _____ Type: _____ Absolute value: _____ Units: _____ Reference range: _____ - _____                                                               |                                                                                                                                                                                                                                              |

| LABORATORY FINDINGS (continued)                                                                                                                                                 |                                                                   |                             |                                   |                                                              |
|---------------------------------------------------------------------------------------------------------------------------------------------------------------------------------|-------------------------------------------------------------------|-----------------------------|-----------------------------------|--------------------------------------------------------------|
| <b>Pathological total or free carnitine</b>                                                                                                                                     | <input type="checkbox"/> Yes                                      | <input type="checkbox"/> No | <input type="checkbox"/> Unknown, | If yes Specify:                                              |
| Type: _____ Tissue: _____                                                                                                                                                       | Absolute value: _____ Units: _____ Reference range: _____ - _____ |                             |                                   |                                                              |
| <b>Pathological acylcarnitine</b>                                                                                                                                               | <input type="checkbox"/> Yes                                      | <input type="checkbox"/> No | <input type="checkbox"/> Unknown, | If yes Specify:                                              |
| Type: _____ Tissue: _____                                                                                                                                                       | Absolute value: _____ Units: _____ Reference range: _____ - _____ |                             |                                   |                                                              |
| <b>Pathological Q10</b>                                                                                                                                                         | <input type="checkbox"/> Yes                                      | <input type="checkbox"/> No | <input type="checkbox"/> Unknown, | If yes Specify:                                              |
| Type: _____ Tissue: _____                                                                                                                                                       | Absolute value: _____ Units: _____ Reference range: _____ - _____ |                             |                                   |                                                              |
| <b>Pathological a-fetoprotein</b>                                                                                                                                               | <input type="checkbox"/> Yes                                      | <input type="checkbox"/> No | <input type="checkbox"/> Unknown, | If yes Specify:                                              |
| Type: _____ Tissue: _____                                                                                                                                                       | Absolute value: _____ Units: _____ Reference range: _____ - _____ |                             |                                   |                                                              |
| <b>Pyruvate dehydrogenase complex deficiency</b>                                                                                                                                | <input type="checkbox"/> Yes                                      | <input type="checkbox"/> No | <input type="checkbox"/> Unknown  |                                                              |
| <b>Pyruvate carboxylase deficiency</b>                                                                                                                                          | <input type="checkbox"/> Yes                                      | <input type="checkbox"/> No | <input type="checkbox"/> Unknown  |                                                              |
| <b>Krebs cycle enzyme deficiency</b>                                                                                                                                            | <input type="checkbox"/> Yes Specify: _____                       |                             |                                   | <input type="checkbox"/> No <input type="checkbox"/> Unknown |
| <b>Other enzyme deficiency</b>                                                                                                                                                  | <input type="checkbox"/> Yes Specify: _____                       |                             |                                   | <input type="checkbox"/> No <input type="checkbox"/> Unknown |
| <b>Blue native gel performed:</b>                                                                                                                                               | <input type="checkbox"/> Yes                                      | <input type="checkbox"/> No | <input type="checkbox"/> Unknown  |                                                              |
| If yes, specify tissue and findings: _____                                                                                                                                      |                                                                   |                             |                                   |                                                              |
| <b>Comments:</b>                                                                                                                                                                |                                                                   |                             |                                   |                                                              |
| MUSCLE PATHOLOGY                                                                                                                                                                |                                                                   |                             |                                   |                                                              |
| <input type="checkbox"/> Normal <input type="checkbox"/> Abnormal                                                                                                               |                                                                   |                             |                                   |                                                              |
| If abnormal, specify: <input type="checkbox"/> COX deficiency <input type="checkbox"/> SDH deficiency <input type="checkbox"/> Ragged Red Fibers                                |                                                                   |                             |                                   |                                                              |
| <input type="checkbox"/> Mitochondrial proliferation <input type="checkbox"/> Other, specify: _____                                                                             |                                                                   |                             |                                   |                                                              |
| <b>- Electron microscopy performed:</b> <input type="checkbox"/> Yes <input type="checkbox"/> No <input type="checkbox"/> Unknown                                               |                                                                   |                             |                                   |                                                              |
| If yes, specify findings: _____                                                                                                                                                 |                                                                   |                             |                                   |                                                              |
| LIVER PATHOLOGY                                                                                                                                                                 |                                                                   |                             |                                   |                                                              |
| <input type="checkbox"/> Normal <input type="checkbox"/> Abnormal <input type="checkbox"/> Unknown                                                                              |                                                                   |                             |                                   |                                                              |
| If abnormal, specify: <input type="checkbox"/> Inflammation <input type="checkbox"/> Steatosis <input type="checkbox"/> Fibrosis <input type="checkbox"/> Other, specify: _____ |                                                                   |                             |                                   |                                                              |
| GENETIC INVESTIGATIONS                                                                                                                                                          |                                                                   |                             |                                   |                                                              |
| <b>- Has the patient undergone genetic investigation(s)?</b> <input type="checkbox"/> Yes <input type="checkbox"/> No <input type="checkbox"/> Unknown, If yes Specify:         |                                                                   |                             |                                   |                                                              |
| a) the type of genetic investigation(s) performed: _____                                                                                                                        |                                                                   |                             |                                   |                                                              |
| b) the genetic findings herebelow: _____                                                                                                                                        |                                                                   |                             |                                   |                                                              |
| <b>- Does the patient harbor a pathogenic mutation?</b> <input type="checkbox"/> Yes <input type="checkbox"/> No <input type="checkbox"/> Unknown                               |                                                                   |                             |                                   |                                                              |
| If yes specify below, including the locus, grade of heteroplasmy and tissue where applicable:                                                                                   |                                                                   |                             |                                   |                                                              |
| <input type="checkbox"/> MTND1                                                                                                                                                  | <input type="checkbox"/> Not Performed                            | _____                       |                                   |                                                              |
| <input type="checkbox"/> MTND3                                                                                                                                                  | <input type="checkbox"/> Not Performed                            | _____                       |                                   |                                                              |
| <input type="checkbox"/> MTND4                                                                                                                                                  | <input type="checkbox"/> Not Performed                            | _____                       |                                   |                                                              |
| <input type="checkbox"/> MTND5                                                                                                                                                  | <input type="checkbox"/> Not Performed                            | _____                       |                                   |                                                              |
| <input type="checkbox"/> MTND6                                                                                                                                                  | <input type="checkbox"/> Not Performed                            | _____                       |                                   |                                                              |
| <input type="checkbox"/> MTATP6                                                                                                                                                 | <input type="checkbox"/> Not Performed                            | _____                       |                                   |                                                              |
| <input type="checkbox"/> MTTL1                                                                                                                                                  | <input type="checkbox"/> Not Performed                            | _____                       |                                   |                                                              |
| <input type="checkbox"/> MTTK                                                                                                                                                   | <input type="checkbox"/> Not Performed                            | _____                       |                                   |                                                              |
| <input type="checkbox"/> MTCO3                                                                                                                                                  | <input type="checkbox"/> Not Performed                            | _____                       |                                   |                                                              |
| <input type="checkbox"/> Other mitochondrial gene: _____                                                                                                                        |                                                                   | _____                       |                                   |                                                              |
| <input type="checkbox"/> SURF1                                                                                                                                                  | <input type="checkbox"/> Not Performed                            | _____                       |                                   |                                                              |
| <input type="checkbox"/> NDUFV1                                                                                                                                                 | <input type="checkbox"/> Not Performed                            | _____                       |                                   |                                                              |
| <input type="checkbox"/> NDUFS                                                                                                                                                  | <input type="checkbox"/> Not Performed                            | _____                       |                                   |                                                              |
| <input type="checkbox"/> SUCLA2                                                                                                                                                 | <input type="checkbox"/> Not Performed                            | _____                       |                                   |                                                              |
| <input type="checkbox"/> SUCLG1                                                                                                                                                 | <input type="checkbox"/> Not Performed                            | _____                       |                                   |                                                              |
| <input type="checkbox"/> PDHA1                                                                                                                                                  | <input type="checkbox"/> Not Performed                            | _____                       |                                   |                                                              |
| <input type="checkbox"/> Other nuclear gene: _____                                                                                                                              |                                                                   | _____                       |                                   |                                                              |
| <b>- Does the patient harbor a mtDNA depletion?</b> <input type="checkbox"/> Yes <input type="checkbox"/> No <input type="checkbox"/> Unknown                                   |                                                                   |                             |                                   |                                                              |
| If yes, specify: a) the method used: _____                                                                                                                                      |                                                                   |                             |                                   |                                                              |
| b) the percentage of abnormal mtDNA: _____ %                                                                                                                                    |                                                                   |                             |                                   |                                                              |
| c) the corresponding tissue: _____                                                                                                                                              |                                                                   |                             |                                   |                                                              |

| MRI FINDINGS                                                                                                                                                                                                                                                                                                                                                                                                                                                                                                                                   |                                                                                |                                                                                |                                                                           |                                                                                                                         |          |
|------------------------------------------------------------------------------------------------------------------------------------------------------------------------------------------------------------------------------------------------------------------------------------------------------------------------------------------------------------------------------------------------------------------------------------------------------------------------------------------------------------------------------------------------|--------------------------------------------------------------------------------|--------------------------------------------------------------------------------|---------------------------------------------------------------------------|-------------------------------------------------------------------------------------------------------------------------|----------|
| <b>1<sup>st</sup> MRI: Has MRI been done:</b> <input type="checkbox"/> Done <input type="checkbox"/> Unknown/Not done<br><b>If Done, a) Date of 1<sup>st</sup> MRI§:</b> ____/____/____<br><b>b) <input type="checkbox"/> Normal <input type="checkbox"/> Abnormal</b><br><b>If abnormal, specify the anatomical region(s) and type(s) of abnormalities:</b>                                                                                                                                                                                   |                                                                                |                                                                                |                                                                           |                                                                                                                         |          |
| Region                                                                                                                                                                                                                                                                                                                                                                                                                                                                                                                                         | Signal abnormality                                                             |                                                                                |                                                                           | Atrophy                                                                                                                 | Comments |
| <input type="checkbox"/> Putamen                                                                                                                                                                                                                                                                                                                                                                                                                                                                                                               | <input type="checkbox"/> Increased T1<br><input type="checkbox"/> Decreased T1 | <input type="checkbox"/> Increased T2<br><input type="checkbox"/> Decreased T2 | <input type="checkbox"/> Bilateral<br><input type="checkbox"/> Unilateral | <input type="checkbox"/> Bilateral<br><input type="checkbox"/> Unilateral<br><input type="checkbox"/> No Atrophy        |          |
| <input type="checkbox"/> Caudate nucleus                                                                                                                                                                                                                                                                                                                                                                                                                                                                                                       | <input type="checkbox"/> Increased T1<br><input type="checkbox"/> Decreased T1 | <input type="checkbox"/> Increased T2<br><input type="checkbox"/> Decreased T2 | <input type="checkbox"/> Bilateral<br><input type="checkbox"/> Unilateral | <input type="checkbox"/> Bilateral<br><input type="checkbox"/> Unilateral<br><input type="checkbox"/> No Atrophy        |          |
| <input type="checkbox"/> Globus pallidus                                                                                                                                                                                                                                                                                                                                                                                                                                                                                                       | <input type="checkbox"/> Increased T1<br><input type="checkbox"/> Decreased T1 | <input type="checkbox"/> Increased T2<br><input type="checkbox"/> Decreased T2 | <input type="checkbox"/> Bilateral<br><input type="checkbox"/> Unilateral | <input type="checkbox"/> Bilateral<br><input type="checkbox"/> Unilateral<br><input type="checkbox"/> No Atrophy        |          |
| <input type="checkbox"/> Thalamus                                                                                                                                                                                                                                                                                                                                                                                                                                                                                                              | <input type="checkbox"/> Increased T1<br><input type="checkbox"/> Decreased T1 | <input type="checkbox"/> Increased T2<br><input type="checkbox"/> Decreased T2 | <input type="checkbox"/> Bilateral<br><input type="checkbox"/> Unilateral | <input type="checkbox"/> Bilateral<br><input type="checkbox"/> Unilateral<br><input type="checkbox"/> No Atrophy        |          |
| <input type="checkbox"/> N subthalamicus                                                                                                                                                                                                                                                                                                                                                                                                                                                                                                       | <input type="checkbox"/> Increased T1<br><input type="checkbox"/> Decreased T1 | <input type="checkbox"/> Increased T2<br><input type="checkbox"/> Decreased T2 | <input type="checkbox"/> Bilateral<br><input type="checkbox"/> Unilateral | <input type="checkbox"/> Bilateral<br><input type="checkbox"/> Unilateral<br><input type="checkbox"/> No Atrophy        |          |
| <input type="checkbox"/> Midbrain                                                                                                                                                                                                                                                                                                                                                                                                                                                                                                              | <input type="checkbox"/> Increased T1<br><input type="checkbox"/> Decreased T1 | <input type="checkbox"/> Increased T2<br><input type="checkbox"/> Decreased T2 | <input type="checkbox"/> Bilateral<br><input type="checkbox"/> Unilateral | <input type="checkbox"/> Bilateral<br><input type="checkbox"/> Unilateral<br><input type="checkbox"/> No Atrophy        |          |
| <input type="checkbox"/> Pons                                                                                                                                                                                                                                                                                                                                                                                                                                                                                                                  | <input type="checkbox"/> Increased T1<br><input type="checkbox"/> Decreased T1 | <input type="checkbox"/> Increased T2<br><input type="checkbox"/> Decreased T2 | <input type="checkbox"/> Bilateral<br><input type="checkbox"/> Unilateral | <input type="checkbox"/> Bilateral<br><input type="checkbox"/> Unilateral<br><input type="checkbox"/> No Atrophy        |          |
| <input type="checkbox"/> Medulla                                                                                                                                                                                                                                                                                                                                                                                                                                                                                                               | <input type="checkbox"/> Increased T1<br><input type="checkbox"/> Decreased T1 | <input type="checkbox"/> Increased T2<br><input type="checkbox"/> Decreased T2 | <input type="checkbox"/> Bilateral<br><input type="checkbox"/> Unilateral | <input type="checkbox"/> Bilateral<br><input type="checkbox"/> Unilateral<br><input type="checkbox"/> No Atrophy        |          |
| <input type="checkbox"/> Cerebellum                                                                                                                                                                                                                                                                                                                                                                                                                                                                                                            |                                                                                |                                                                                |                                                                           |                                                                                                                         |          |
| <input type="checkbox"/> grey matter                                                                                                                                                                                                                                                                                                                                                                                                                                                                                                           | <input type="checkbox"/> Increased T1<br><input type="checkbox"/> Decreased T1 | <input type="checkbox"/> Increased T2<br><input type="checkbox"/> Decreased T2 | <input type="checkbox"/> Bilateral<br><input type="checkbox"/> Unilateral | <input type="checkbox"/> Bilateral<br><input type="checkbox"/> Unilateral<br><input type="checkbox"/> No Atrophy        |          |
| <input type="checkbox"/> white matter                                                                                                                                                                                                                                                                                                                                                                                                                                                                                                          | <input type="checkbox"/> Increased T1<br><input type="checkbox"/> Decreased T1 | <input type="checkbox"/> Increased T2<br><input type="checkbox"/> Decreased T2 | <input type="checkbox"/> Bilateral<br><input type="checkbox"/> Unilateral | <input type="checkbox"/> Bilateral<br><input type="checkbox"/> Unilateral<br><input type="checkbox"/> No Atrophy        |          |
| <input type="checkbox"/> vermis                                                                                                                                                                                                                                                                                                                                                                                                                                                                                                                | <input type="checkbox"/> Increased T1<br><input type="checkbox"/> Decreased T1 | <input type="checkbox"/> Increased T2<br><input type="checkbox"/> Decreased T2 | <input type="checkbox"/> Bilateral<br><input type="checkbox"/> Unilateral | <input type="checkbox"/> Bilateral<br><input type="checkbox"/> Unilateral<br><input type="checkbox"/> No Atrophy        |          |
| <input type="checkbox"/> peduncles                                                                                                                                                                                                                                                                                                                                                                                                                                                                                                             | <input type="checkbox"/> Increased T1<br><input type="checkbox"/> Decreased T1 | <input type="checkbox"/> Increased T2<br><input type="checkbox"/> Decreased T2 | <input type="checkbox"/> Bilateral<br><input type="checkbox"/> Unilateral | <input type="checkbox"/> Bilateral<br><input type="checkbox"/> Unilateral<br><input type="checkbox"/> No Atrophy        |          |
| <input type="checkbox"/> dentate nucleus                                                                                                                                                                                                                                                                                                                                                                                                                                                                                                       | <input type="checkbox"/> Increased T1<br><input type="checkbox"/> Decreased T1 | <input type="checkbox"/> Increased T2<br><input type="checkbox"/> Decreased T2 | <input type="checkbox"/> Bilateral<br><input type="checkbox"/> Unilateral | <input type="checkbox"/> Bilateral<br><input type="checkbox"/> Unilateral<br><input type="checkbox"/> No Atrophy        |          |
| <input type="checkbox"/> Cerebral cortex                                                                                                                                                                                                                                                                                                                                                                                                                                                                                                       | <input type="checkbox"/> Increased T1<br><input type="checkbox"/> Decreased T1 | <input type="checkbox"/> Increased T2<br><input type="checkbox"/> Decreased T2 | <input type="checkbox"/> Bilateral<br><input type="checkbox"/> Unilateral | <input type="checkbox"/> Bilateral<br><input type="checkbox"/> Unilateral<br><input type="checkbox"/> No Atrophy        |          |
| <input type="checkbox"/> Supratentorial white matter                                                                                                                                                                                                                                                                                                                                                                                                                                                                                           | <input type="checkbox"/> Increased T1<br><input type="checkbox"/> Decreased T1 | <input type="checkbox"/> Increased T2<br><input type="checkbox"/> Decreased T2 | <input type="checkbox"/> Bilateral<br><input type="checkbox"/> Unilateral | <input type="checkbox"/> Bilateral<br><input type="checkbox"/> Unilateral<br><input type="checkbox"/> No Atrophy        |          |
| <input type="checkbox"/> Corpus callosum                                                                                                                                                                                                                                                                                                                                                                                                                                                                                                       | <input type="checkbox"/> Increased T1<br><input type="checkbox"/> Decreased T1 | <input type="checkbox"/> Increased T2<br><input type="checkbox"/> Decreased T2 | <input type="checkbox"/> Bilateral<br><input type="checkbox"/> Unilateral | <input type="checkbox"/> Atrophy/hypoplasia<br><input type="checkbox"/> Agenesis<br><input type="checkbox"/> No Atrophy |          |
| <input type="checkbox"/> Additional/other MRI findings: _____                                                                                                                                                                                                                                                                                                                                                                                                                                                                                  |                                                                                |                                                                                |                                                                           |                                                                                                                         |          |
| <b>- Diffusion-weighted imaging (DWI):</b> <input type="checkbox"/> Normal <input type="checkbox"/> Abnormal <input type="checkbox"/> Unknown/Not done<br><b>If Normal,</b> specify timepoint after acute episode (in days): ____ days<br><b>If abnormal,</b> specify: timepoint after acute episode (in days): ____ days<br>a) type of abnormalities: _____ b) region of abnormalities: _____                                                                                                                                                 |                                                                                |                                                                                |                                                                           |                                                                                                                         |          |
| <b>- Apparent diffusion coefficient (ADC):</b> <input type="checkbox"/> Normal <input type="checkbox"/> Abnormal <input type="checkbox"/> Unknown/Not done<br><b>If abnormal,</b> specify a) type of abnormalities: _____<br>b) region of abnormalities: _____                                                                                                                                                                                                                                                                                 |                                                                                |                                                                                |                                                                           |                                                                                                                         |          |
| <b>- Magnetic Resonance Spectroscopy (MRS):</b> <input type="checkbox"/> Normal <input type="checkbox"/> Abnormal <input type="checkbox"/> Unknown/Not done<br><b>If abnormal,</b> specify type and region of abnormalities<br><input type="checkbox"/> Elevated lactate    Region: _____ <input type="checkbox"/> Decreased NAA    Region: _____<br><input type="checkbox"/> Elevated choline    Region: _____ <input type="checkbox"/> Other, specify _____    Region: _____<br><input type="checkbox"/> Elevated succinate    Region: _____ |                                                                                |                                                                                |                                                                           |                                                                                                                         |          |

[illegible]

**TREATMENT (CONTINUED)**

|                                                      |                                               |                                           |                                                                           |
|------------------------------------------------------|-----------------------------------------------|-------------------------------------------|---------------------------------------------------------------------------|
| <input type="checkbox"/> <b>Arginine</b>             |                                               |                                           |                                                                           |
| <input type="checkbox"/> On-going                    | <i>specify effect of this treatment:</i>      | <input type="checkbox"/> No apparent      | <input type="checkbox"/> Positive effect <input type="checkbox"/> Unknown |
| <input type="checkbox"/> Discontinued                | <i>specify reason(s) for discontinuation:</i> | <input type="checkbox"/> Lack of efficacy | <input type="checkbox"/> Non-compliance                                   |
|                                                      |                                               | <input type="checkbox"/> Lack of safety   | <input type="checkbox"/> Other: _____                                     |
| <input type="checkbox"/> Unknown                     |                                               |                                           |                                                                           |
| <input type="checkbox"/> <b>Carnitine</b>            |                                               |                                           |                                                                           |
| <input type="checkbox"/> On-going                    | <i>specify effect of this treatment:</i>      | <input type="checkbox"/> No apparent      | <input type="checkbox"/> Positive effect <input type="checkbox"/> Unknown |
| <input type="checkbox"/> Discontinued                | <i>specify reason(s) for discontinuation:</i> | <input type="checkbox"/> Lack of efficacy | <input type="checkbox"/> Non-compliance                                   |
|                                                      |                                               | <input type="checkbox"/> Lack of safety   | <input type="checkbox"/> Other: _____                                     |
| <input type="checkbox"/> Unknown                     |                                               |                                           |                                                                           |
| <input type="checkbox"/> <b>Other, specify</b> _____ |                                               |                                           |                                                                           |
| <input type="checkbox"/> On-going                    | <i>specify effect of this treatment:</i>      | <input type="checkbox"/> No apparent      | <input type="checkbox"/> Positive effect <input type="checkbox"/> Unknown |
| <input type="checkbox"/> Discontinued                | <i>specify reason(s) for discontinuation:</i> | <input type="checkbox"/> Lack of efficacy | <input type="checkbox"/> Non-compliance                                   |
|                                                      |                                               | <input type="checkbox"/> Lack of safety   | <input type="checkbox"/> Other: _____                                     |
| <input type="checkbox"/> Unknown                     |                                               |                                           |                                                                           |
| <input type="checkbox"/> <b>Other, specify</b> _____ |                                               |                                           |                                                                           |
| <input type="checkbox"/> On-going                    | <i>specify effect of this treatment:</i>      | <input type="checkbox"/> No apparent      | <input type="checkbox"/> Positive effect <input type="checkbox"/> Unknown |
| <input type="checkbox"/> Discontinued                | <i>specify reason(s) for discontinuation:</i> | <input type="checkbox"/> Lack of efficacy | <input type="checkbox"/> Non-compliance                                   |
|                                                      |                                               | <input type="checkbox"/> Lack of safety   | <input type="checkbox"/> Other: _____                                     |
| <input type="checkbox"/> Unknown                     |                                               |                                           |                                                                           |

**ELECTRONIC SIGNATURE**

I have carefully checked all data recorded in the electronic Case Report Form and I confirm that they are true, complete and accurate to the best of my knowledge.

**Please enter your password:**

**Attachment I: Instructions for Investigator**

|                                                                                                                   |
|-------------------------------------------------------------------------------------------------------------------|
| <b>Table INCLUSION/EXCLUSION CRITERIA - Inclusion criteria, page 1</b>                                            |
| <b>Inclusion criterion #2:</b> Neuroimaging findings include increased T2 signal on MRI or low attenuation on CT. |

|                                                                                                                                                                                                                                                                                                                                                                                                                                                                                            |
|--------------------------------------------------------------------------------------------------------------------------------------------------------------------------------------------------------------------------------------------------------------------------------------------------------------------------------------------------------------------------------------------------------------------------------------------------------------------------------------------|
| <b>Table MEDICAL HISTORY - Perinatal History, page 1</b>                                                                                                                                                                                                                                                                                                                                                                                                                                   |
| <b>Perinatal History – Birth weight - IUGR</b><br>AGA (appropriate for gestational age): between the 10 <sup>th</sup> and 90 <sup>th</sup> percentile for gestational age<br>SGA (small for gestational age): below the 10 <sup>th</sup> percentile for gestational age<br>LGA (large for gestational age): above the 90 <sup>th</sup> percentile for gestational age<br>IUGR (intra-uterine growth restricted): diminished growth velocity of the fetus on serial ultrasonographic scans. |

|                                                                                                                                                                                                             |
|-------------------------------------------------------------------------------------------------------------------------------------------------------------------------------------------------------------|
| <b>Table MEDICAL HISTORY - Perinatal History, page 1</b>                                                                                                                                                    |
| <b>Perinatal History – Head circumference at birth</b><br>Normal: between –2SD and +2SD for gestational age<br>Microcephaly: below –2SD for gestational age<br>Macrocephaly: above +2SD for gestational age |

|                                                                                                                                                                                                                   |
|-------------------------------------------------------------------------------------------------------------------------------------------------------------------------------------------------------------------|
| <b>Table MEDICAL HISTORY - Other dysfunction, page 3</b>                                                                                                                                                          |
| <b>Failure to thrive:</b> weight for age that falls below the 5 <sup>th</sup> percentile on multiple occasions or weight deceleration that crosses two or more major percentile lines on a growth chart over time |

|                                                                                                                                                                                                                                                                                                                           |
|---------------------------------------------------------------------------------------------------------------------------------------------------------------------------------------------------------------------------------------------------------------------------------------------------------------------------|
| <b>Table MEDICAL HISTORY - Other dysfunction, page 3</b>                                                                                                                                                                                                                                                                  |
| <b>Mental retardation:</b> categorization will be based on the DSM-IV and ICD 10 criteria for mental retardation. According to ICD 10:<br>Mild mental retardation: IQ range 50-69<br>Moderate mental retardation: IQ range 35-49<br>Severe mental retardation: IQ range 20-34<br>Profound mental retardation: IQ below 20 |

|                                                                                                                                                 |
|-------------------------------------------------------------------------------------------------------------------------------------------------|
| <b>Table MEDICAL HISTORY - Other dysfunction, page 3</b>                                                                                        |
| <b>Progressive microcephaly:</b> deceleration of head circumference that crosses two or more major percentile lines on a growth chart over time |

|                                                                                                                                                                                                                                                     |
|-----------------------------------------------------------------------------------------------------------------------------------------------------------------------------------------------------------------------------------------------------|
| <b>Table DISEASE COURSE, page 4</b>                                                                                                                                                                                                                 |
| <b>Disease course:</b> Acute exacerbation/relapse is defined as a worsening of patient's condition lasting longer than 24h, accompanied by significant deterioration of patient's motor function, requiring hospitalization and acute intervention. |

|                                                                                                                                                                                                                                   |
|-----------------------------------------------------------------------------------------------------------------------------------------------------------------------------------------------------------------------------------|
| <b>Table SURVIVAL STATUS, page 4</b>                                                                                                                                                                                              |
| <b>Survival status</b><br><b>Current status:</b> patient's status at the time of data registration on the present CRF<br><b>Lost-to-follow-up:</b> specify last date of follow-up either in your site or elsewhere, if applicable |

|                                                                                                                                        |
|----------------------------------------------------------------------------------------------------------------------------------------|
| <b>Table GROWTH, page 4</b>                                                                                                            |
| <b>Growth:</b> measurements at last visit. This also applies in case of death or lost-to-follow-up.<br>Example: weight for age -1.5 SD |

|                                                                                                                                                                                                                                                                                                                                                        |
|--------------------------------------------------------------------------------------------------------------------------------------------------------------------------------------------------------------------------------------------------------------------------------------------------------------------------------------------------------|
| <b>Table LABORATORY FINDINGS, page 4</b>                                                                                                                                                                                                                                                                                                               |
| <b>Laboratory findings:</b> for lactate and pyruvate absolute values, please provide the maximum available values. For the lactate/pyruvate ratio, please provide the absolute value of lactate in CSF / the absolute value of pyruvate in CSF, taken at the same time. For the CSF/serum albumin ratio, the maximum available value will be provided. |

|                                                                                                                        |
|------------------------------------------------------------------------------------------------------------------------|
| <b>Table MRI FINDINGS, page 7</b>                                                                                      |
| <b>Date of 3<sup>rd</sup> MRI:</b> In case of more than three MRIs available, register data on the last MRI performed. |
